# Supplementary material
Source: PubMed Central journal article supplement (PMC7787139)
Supplement: NIHMS1540503-supplement-1.pdf [file NIHMS1540503-supplement-1.pdf]

## Supplementary material

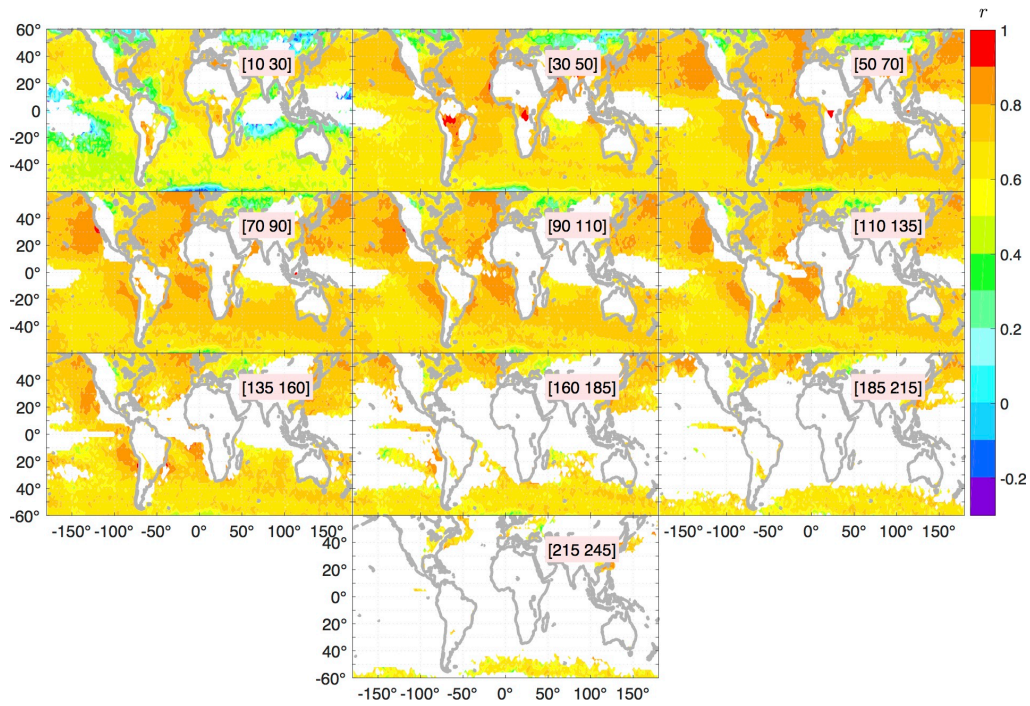

Figure S1: Seasonally averaged linear correlation coefficient between albedo  $A$  and  $\ln(N_a)$  for the 10 LWP bins utilized in this study.

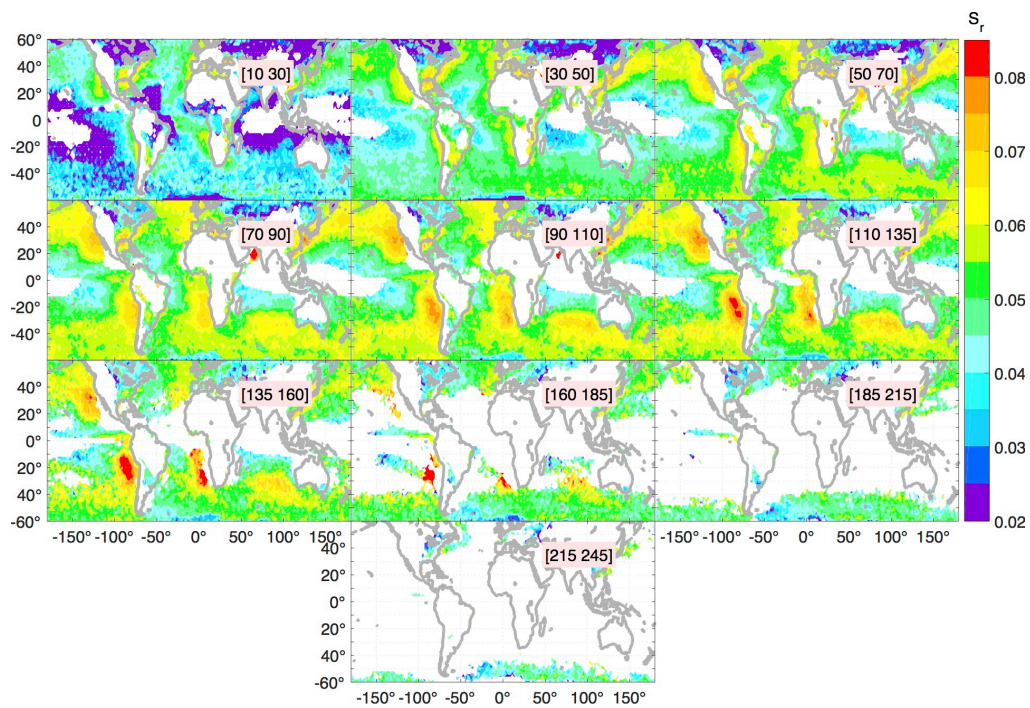

Figure S2: Seasonally averaged relative susceptibility for the 10 LWP bins utilized in this study.

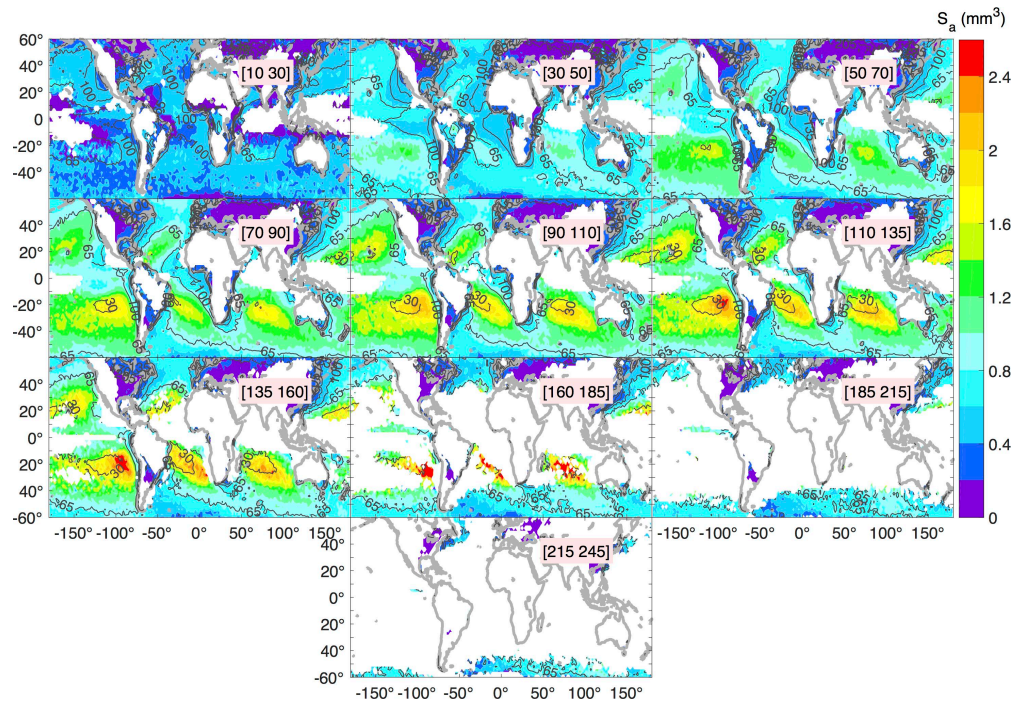

Figure S3: Seasonally averaged absolute susceptibility for the 10 LWP bins utilized in this study.

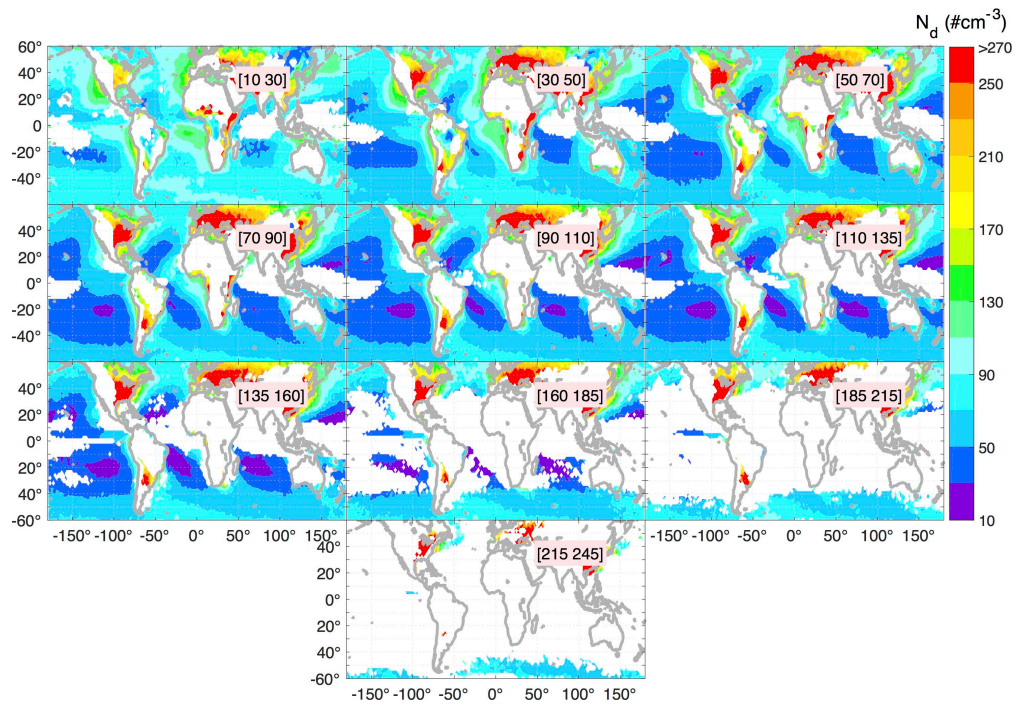

Figure S4: Seasonally averaged  $N_d$  for the 10 LWP bins utilized in this study.

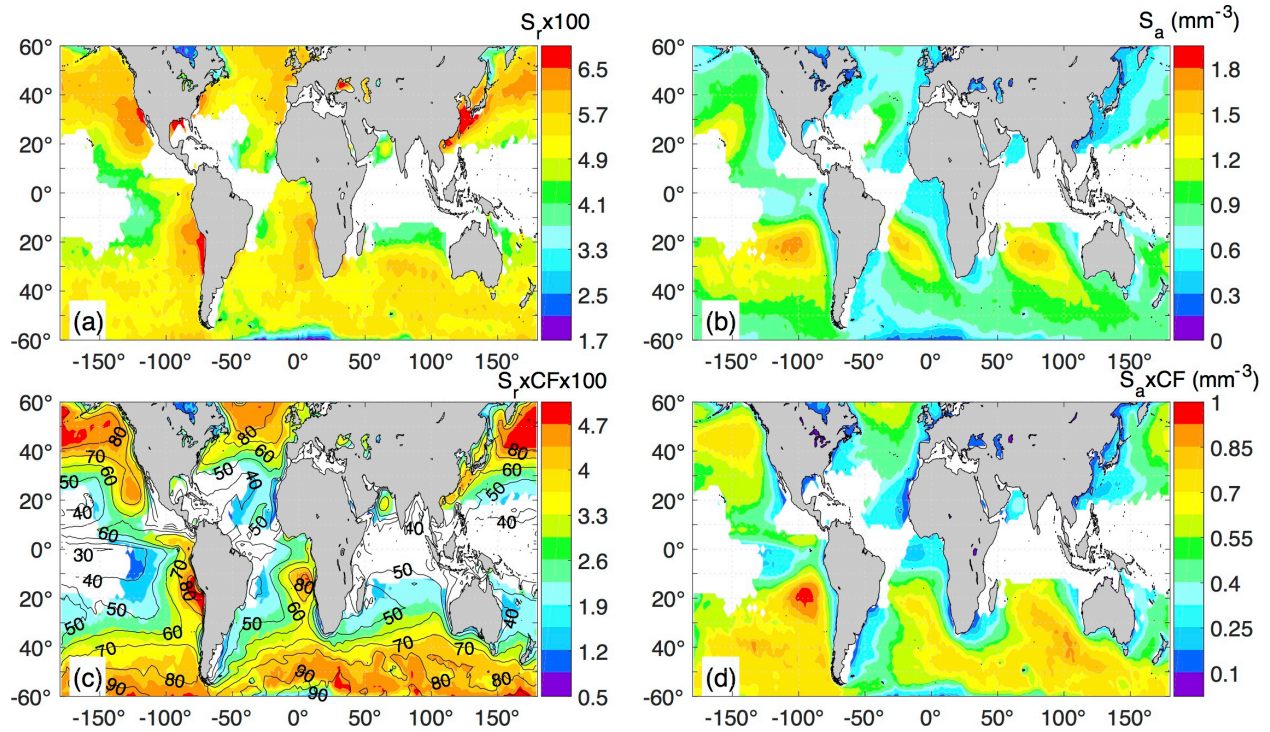

Figure S5: Annual values of a) albedo relative susceptibility, b) absolute albedo susceptibility, c) as in a) but multiplied by cloud fraction, d) as in b) but multiplied by cloud fraction.
